# Supplementary material
Source: Springer Nature journal article supplement (https://www.springermedizin.de/resource/supplementary/12967_2006_167_MOESM10_ESM.pdf/9575994)

**Log2 FC TNFSF10**

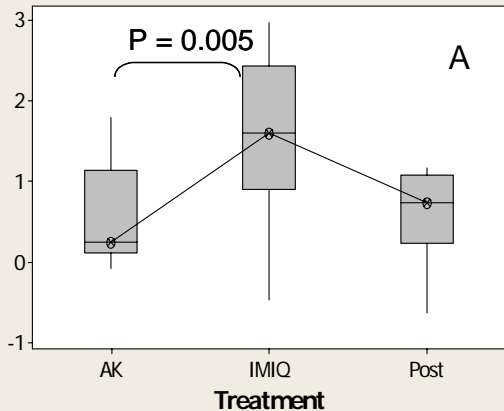

**Log2 FC MX1**

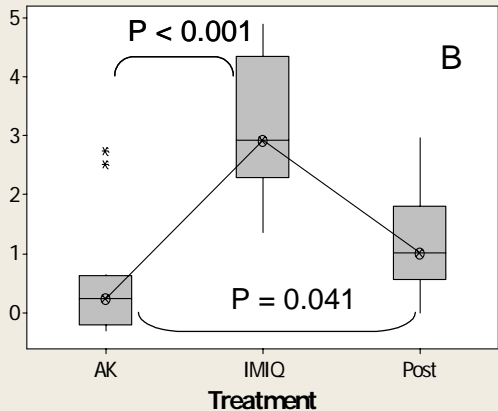

Supplement: MOESM10 [file 9575994]
